# Supplementary material for: Manganese (Mn) doping effects on the structure and surface characteristics of copper zinc tin sulphide (CZTS) transition metal sulphides synthesised via a sol–gel method
Source: Royal Society of Chemistry journal article supplement (doi:10.1039/d5ra09688j), 2026-03-27
Supplement: d5ra09688j1.pdf [file d5ra09688j1.pdf]

## SUPPLEMENTARY INFORMATION

### Figure S1 - XRD analysis

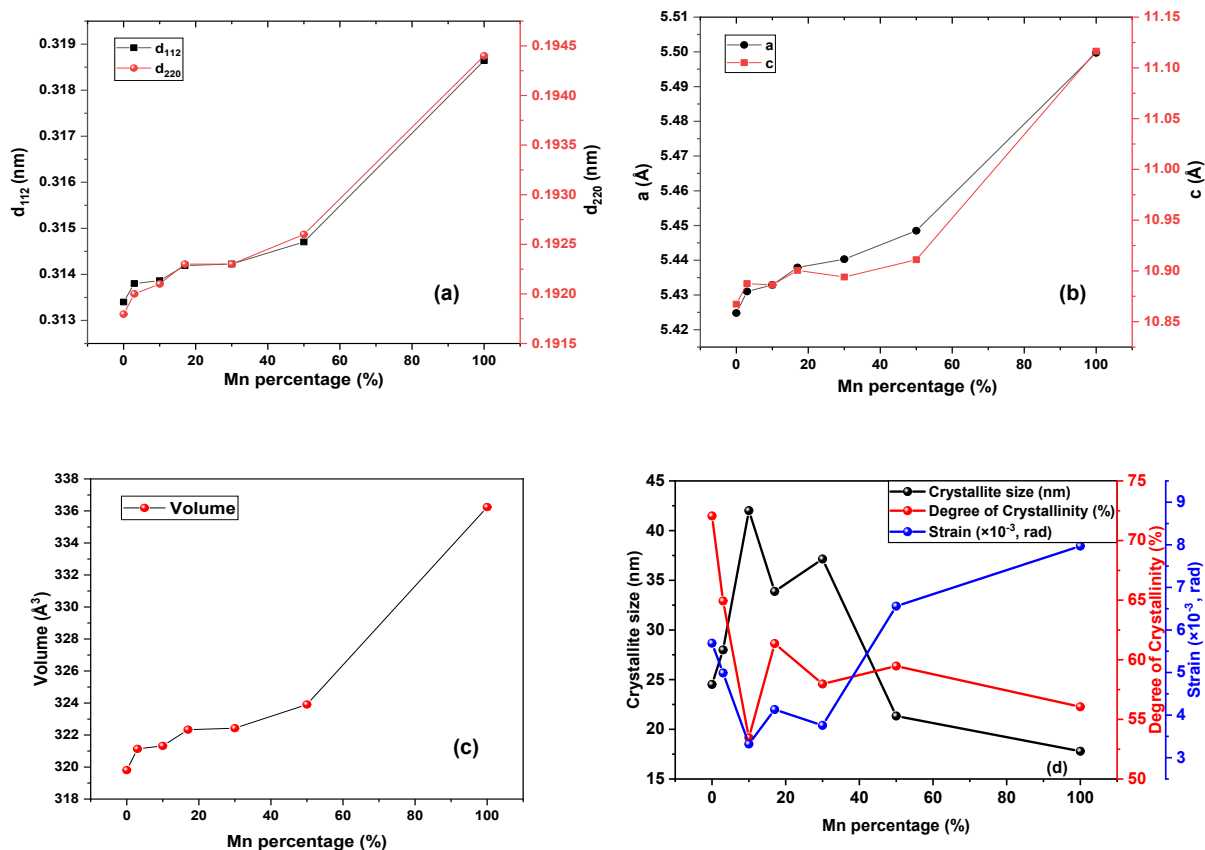

**Figure S1** (a) interplanar spacing for various Mn percentages, (b) Lattice parameters ‘a’ and ‘c’ for Mn doped CZTS samples, and (c) volume for Mn doped CZTS samples (d) crystallite size, degree of crystallinity, and strain for Mn doped CZTS samples.

**Table S1.** The crystallite size and strain for Williamson-hall method, Scherrer method and modified Scherrer method and calculated strain values to identify nature of strain

| Sample<br>(Zn:Mn)<br>percentage<br>ratio | Williamson–Hall method                |                                            | Scherrer Method                       |                                            | Modified Scherrer method              | Nature of strain calculation |              |                             |
|------------------------------------------|---------------------------------------|--------------------------------------------|---------------------------------------|--------------------------------------------|---------------------------------------|------------------------------|--------------|-----------------------------|
|                                          | Crystallite<br>Size ( <i>D</i> ) (nm) | Strain,<br>$\epsilon \times 10^{-3}$ (rad) | Crystallite<br>Size ( <i>D</i> ) (nm) | Strain,<br>$\epsilon \times 10^{-3}$ (rad) | Crystallite Size ( <i>D</i> )<br>(nm) | $K(d_{112})$                 | $K(d_{220})$ | Avg. strain<br>( <i>K</i> ) |
| <b>S0 (100:0)</b>                        | 31.45                                 | 1.75                                       | 24.52                                 | 5.69                                       | 21.10                                 | 0                            | 0            | 0.0000                      |
| <b>S1 (97:3)</b>                         | 36.56                                 | 1.17                                       | 27.99                                 | 4.99                                       | 29.72                                 | 0.0013                       | 0.0010       | 0.0012                      |
| <b>S2 (90:10)</b>                        | 103.87                                | 1.97                                       | 42.01                                 | 3.32                                       | 48.08                                 | 0.0015                       | 0.0016       | 0.0015                      |
| <b>S3 (83:17)</b>                        | 40.21                                 | 1.02                                       | 33.88                                 | 4.13                                       | 31.62                                 | 0.0025                       | 0.0026       | 0.0026                      |
| <b>S4 (70:30)</b>                        | 57.37                                 | 1.33                                       | 37.14                                 | 3.76                                       | 40.45                                 | 0.0026                       | 0.0026       | 0.0026                      |
| <b>S5 (50:50)</b>                        | 24.48                                 | 0.93                                       | 21.34                                 | 6.56                                       | 21.78                                 | 0.0042                       | 0.0042       | 0.0042                      |
| <b>S6 (0:100)</b>                        | 20.59                                 | 2.43                                       | 17.79                                 | 7.97                                       | 15.58                                 | 0.0167                       | 0.0136       | 0.0151                      |

Figure S2 - BET analysis

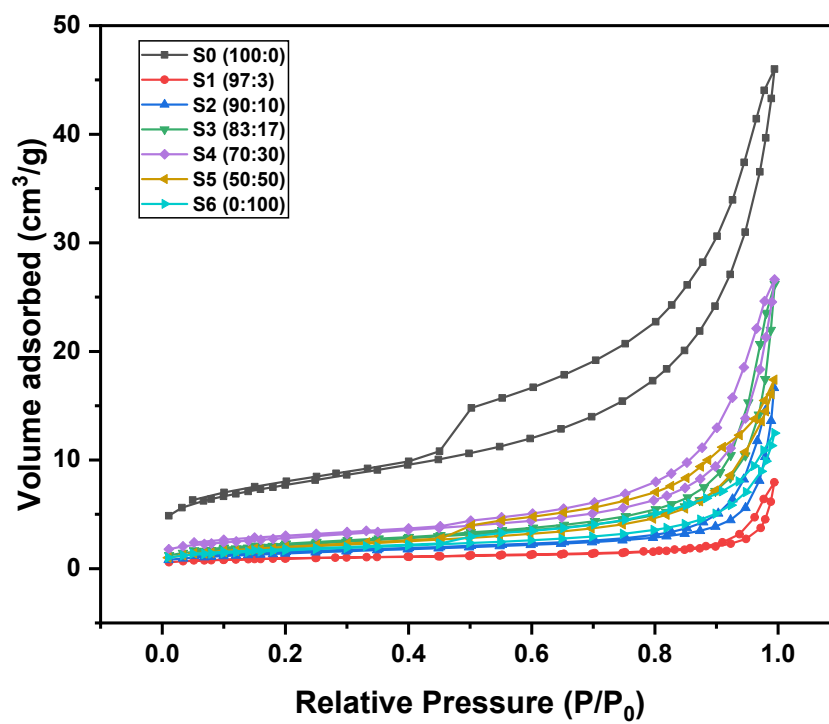

Figure S2. BET-N<sub>2</sub> adsorption-desorption isotherm

**Table S2:** Surface area and pore size for all anode samples.

| <b>Sample (Zn:Mn)<br/>percentage ratio</b> | <b>BET Surface<br/>area, m<sup>2</sup>/g</b> | <b>Langmuir Surface<br/>area, m<sup>2</sup>/g</b> | <b>Adsorption pore<br/>size, nm</b> | <b>Desorption pore<br/>size, nm</b> | <b>adsorption pore<br/>volume (cm<sup>3</sup>/g)</b> | <b>desorption pore<br/>volume (cm<sup>3</sup>/g)</b> |
|--------------------------------------------|----------------------------------------------|---------------------------------------------------|-------------------------------------|-------------------------------------|------------------------------------------------------|------------------------------------------------------|
| <b>S0 (100:0)</b>                          | 27.5130                                      | 53.3894                                           | 7.1012                              | 8.6385                              | 0.0488                                               | 0.0594                                               |
| <b>S1 (97:3)</b>                           | 3.3603                                       | 6.3028                                            | 5.1224                              | 6.9673                              | 0.0043                                               | 0.0059                                               |
| <b>S2 (90:10)</b>                          | 5.0669                                       | 11.1901                                           | 7.0569                              | 10.9467                             | 0.0089                                               | 0.0139                                               |
| <b>S3 (83:17)</b>                          | 7.8286                                       | 16.3453                                           | 8.4935                              | 11.6504                             | 0.0166                                               | 0.0228                                               |
| <b>S4 (70:30)</b>                          | 10.0245                                      | 21.1536                                           | 8.7884                              | 11.9997                             | 0.0220                                               | 0.0301                                               |
| <b>S5 (50:50)</b>                          | 7.0641                                       | 15.9444                                           | 9.6853                              | 11.3034                             | 0.0171                                               | 0.01996                                              |
| <b>S6 (0:100)</b>                          | 6.0252                                       | 12.5485                                           | 7.3430                              | 8.8983                              | 0.0111                                               | 0.0134                                               |

Figure S3. DLS analysis

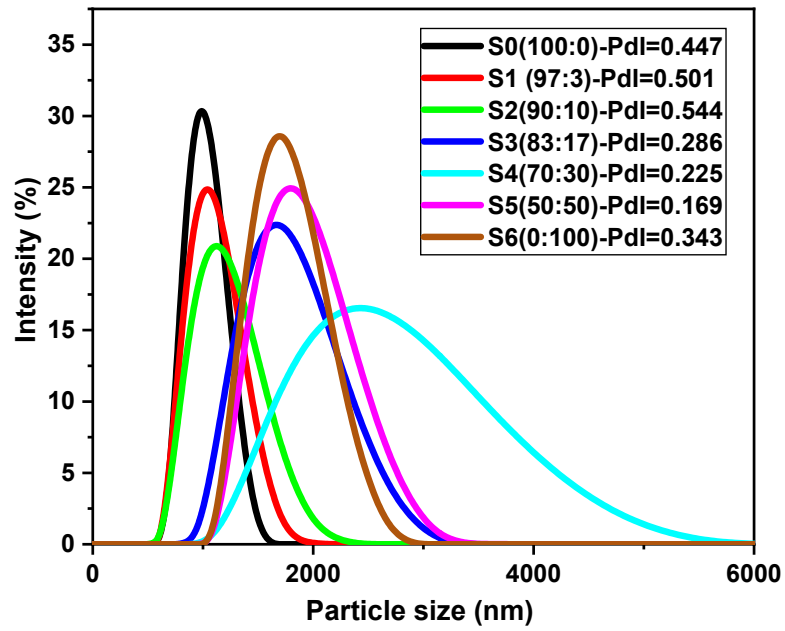

Figure S3. particle size distribution from DLS measurements
